# Supplementary material
Source: PubMed Central journal article supplement (PMC2782390)

## 1 SUPPLEMENTAL MATERIAL

2 Supplemental Table S1. Allele frequencies for 11 *CYP2E1* polymorphisms in 50 populations.  
3 Frequencies are given for the ancestral allele for the SNPs. The most common allele is shown  
4 for the VNTR since the ancestral allele cannot be determined.

5  
6 Supplemental Table S2. Pairwise LD values measured as  $r^2$  averaged across the 50 populations  
7 studied.

8  
9 Supplemental Table S3. The 16 commonly occurring haplotypes explained as combinations of  
10 haplotypes at three core regions defined by markers 1-5, markers 6-9, and markers 10-11. The  
11 numbers refer to the haplotypes in Figure 3 for each of the cores. Each of these core haplotypes  
12 in Figure 3 can be explained as simple accumulation of mutations with no internal recombination.

13  
14 Supplemental Figure S1. The  $F_{st}$  values and average heterozygosities plotted by physical position  
15 along the chromosome for each of the 11 markers in *CYP2E1* region based on the 50 population  
16 samples.

17  
18 Supplemental Figure S2a. HAPLOT diagram showing regions of high LD across 11 markers at  
19 *CYP2E1*, based on  $r^2$  values. The default parameter values in HAPLOT were used.

20  
21 Supplemental Figure S2b. HAPLOT diagram showing regions of high LD across 11 markers at  
22 *CYP2E1*, based on  $D'$  values. The default parameter values in HAPLOT were used.

23  
24 Supplemental Figure S3. Haplotype frequencies for core A (5 upstream markers studied: 1-5 in

1 Table 1) in the 50 population samples studied. The 5 common haplotypes with frequencies of 5%  
2 or more are shown. Rare haplotypes are combined in the residual class.

3

4 Supplemental Figure S4. Haplotype frequencies for core B (markers 6-9 in Table 1) in the 50  
5 population samples studied. The 4 common haplotypes with frequencies of 5% or more are  
6 shown. Rare haplotypes are combined in the residual class.

7

8 Supplemental Figure S5. Haplotype frequencies for core C (markers 10-11 in Table 1) in 50  
9 population samples. Three of 4 haplotypes occur at common frequencies of 5% or more.

**Supplemental Table S1.**

**Allele frequencies for 11 CYP2E1 markers in 50 population samples--ancestral allele for SNPs**

| Markers:        | VNTR  | rs3813867 | rs2031920 | rs2070672 | rs6413420 | rs6413419 | rs915909 | rs4646976 | rs6413432 | rs2070676 | rs2515641 |
|-----------------|-------|-----------|-----------|-----------|-----------|-----------|----------|-----------|-----------|-----------|-----------|
| Alleles:        | 6rpt  | G         | C         | A         | G         | G         | C        | A         | A         | G         | C         |
| Biaka           | 0.667 | 0.971     | 0.993     | 0.669     | 0.906     | 0.942     | 0.877    | 0.921     | 0.229     | 0.645     | 0.442     |
| Mbuti           | 0.605 | 0.974     | 1.000     | 0.566     | 1.000     | 0.962     | 0.821    | 0.961     | 0.276     | 0.538     | 0.462     |
| Yoruba          | 0.860 | 0.968     | 0.994     | 0.833     | 1.000     | 0.756     | 0.948    | 0.910     | 0.073     | 0.737     | 0.314     |
| Ibo             | 0.917 | 0.948     | 1.000     | 0.917     | 0.990     | 0.667     | 0.927    | 0.979     | 0.062     | 0.649     | 0.375     |
| Hausa           | 0.908 | 0.973     | 1.000     | 0.895     | 0.974     | 0.750     | 0.846    | 0.959     | 0.026     | 0.744     | 0.308     |
| Chagga          | 0.867 | 0.933     | 1.000     | 0.889     | 0.978     | 0.844     | 0.889    | 0.922     | 0.056     | 0.811     | 0.233     |
| Masai           | 0.941 | 1.000     | 1.000     | 0.950     | 1.000     | 0.825     | 0.925    | 1.000     | 0.050     | 0.700     | 0.325     |
| Sandawe         | 0.859 | 1.000     | 0.974     | 0.862     | 0.900     | 0.912     | 0.962    | 1.000     | 0.012     | 0.628     | 0.362     |
| AfrAmericans    | 0.878 | 0.918     | 0.978     | 0.896     | 0.989     | 0.802     | 0.906    | 0.933     | 0.074     | 0.566     | 0.456     |
| Ethiopians      | 0.891 | 0.984     | 1.000     | 0.891     | 0.891     | 1.000     | 1.000    | 1.000     | 0.047     | 0.391     | 0.656     |
| Somali          | 0.825 | 0.972     | 1.000     | 0.800     | 0.900     | 0.975     | 1.000    | 0.925     | 0.132     | 0.500     | 0.500     |
| Yemenites       | 0.930 | 1.000     | 1.000     | 0.930     | 0.919     | 0.895     | 0.977    | 1.000     | 0.070     | 0.267     | 0.744     |
| Druze           | 0.951 | 0.960     | 0.937     | 0.947     | 0.966     | 0.947     | 1.000    | 0.964     | 0.054     | 0.152     | 0.854     |
| Samaritans      | 0.950 | 1.000     | 0.988     | 0.936     | 0.838     | 0.988     | 1.000    | 1.000     | 0.012     | 0.200     | 0.800     |
| Ashkenazi       | 0.975 | 0.926     | 0.939     | 0.975     | 0.944     | 0.981     | 1.000    | 0.994     | 0.125     | 0.160     | 0.850     |
| Adygei          | 0.943 | 0.991     | 0.991     | 0.935     | 0.944     | 0.907     | 1.000    | 0.981     | 0.113     | 0.170     | 0.833     |
| Chuvash         | 0.976 | 0.964     | 0.961     | 0.976     | 0.929     | 0.988     | 1.000    | 0.986     | 0.071     | 0.119     | 0.881     |
| Hungarians      | 0.983 | 0.983     | 0.977     | 0.983     | 0.961     | 0.955     | 1.000    | 0.989     | 0.062     | 0.152     | 0.848     |
| Russians_A      | 0.970 | 0.969     | 0.970     | 0.970     | 0.955     | 0.955     | 1.000    | 1.000     | 0.076     | 0.121     | 0.879     |
| Russians_V      | 0.957 | 0.979     | 0.990     | 0.958     | 0.969     | 0.958     | 1.000    | 0.979     | 0.085     | 0.117     | 0.885     |
| Finns           | 0.986 | 0.972     | 0.986     | 0.986     | 0.944     | 0.972     | 1.000    | 0.986     | 0.186     | 0.129     | 0.875     |
| Danes           | 0.990 | 1.000     | 1.000     | 1.000     | 0.951     | 0.990     | 1.000    | 1.000     | 0.147     | 0.088     | 0.912     |
| Irish           | 0.996 | 0.965     | 0.961     | 0.996     | 0.969     | 0.978     | 1.000    | 0.991     | 0.112     | 0.062     | 0.939     |
| EuroAmericans   | 0.984 | 0.951     | 0.934     | 0.984     | 0.929     | 0.967     | 1.000    | 1.000     | 0.124     | 0.122     | 0.864     |
| Komi Zyriane    | 0.968 | 1.000     | 1.000     | 0.968     | 0.926     | 0.913     | 1.000    | 0.979     | 0.032     | 0.191     | 0.809     |
| Khanty          | 0.980 | 0.950     | 0.947     | 0.980     | 1.000     | 1.000     | 1.000    | 0.980     | 0.100     | 0.030     | 0.970     |
| Mohanna         | 0.798 | 1.000     | 1.000     | 0.798     | 0.904     | 1.000     | 0.990    | 0.970     | 0.183     | 0.093     | 0.913     |
| Negroid Makrani | 0.750 | 0.981     | 1.000     | 0.732     | 0.911     | 0.911     | 0.981    | 0.946     | 0.240     | 0.426     | 0.630     |
| Hazara          | 0.931 | 0.931     | 0.931     | 0.931     | 0.929     | 1.000     | 1.000    | 0.897     | 0.155     | 0.172     | 0.821     |
| Keralites       | 0.767 | 0.983     | 0.983     | 0.767     | 0.948     | 0.946     | 0.983    | 0.917     | 0.150     | 0.207     | 0.800     |
| Yakut           | 0.892 | 0.912     | 0.912     | 0.892     | 1.000     | 1.000     | 1.000    | 0.890     | 0.108     | 0.078     | 0.922     |
| Nasioi          | 1.000 | 0.978     | 0.977     | 1.000     | 1.000     | 1.000     | 1.000    | 1.000     | 0.000     | 0.022     | 1.000     |
| Micronesians    | 0.944 | 0.824     | 0.838     | 0.932     | 0.973     | 0.986     | 1.000    | 0.878     | 0.095     | 0.189     | 0.824     |
| Laotians        | 0.765 | 0.811     | 0.811     | 0.771     | 0.987     | 1.000     | 0.996    | 0.836     | 0.267     | 0.186     | 0.819     |
| Cambodians      | 0.875 | 0.917     | 0.958     | 0.860     | 0.920     | 1.000     | 1.000    | 0.875     | 0.109     | 0.167     | 0.800     |
| SF Chinese      | 0.750 | 0.776     | 0.750     | 0.759     | 1.000     | 1.000     | 1.000    | 0.758     | 0.269     | 0.224     | 0.788     |
| TW Chinese      | 0.850 | 0.730     | 0.806     | 0.847     | 1.000     | 1.000     | 1.000    | 0.850     | 0.327     | 0.130     | 0.870     |
| Hakka           | 0.707 | 0.817     | 0.817     | 0.700     | 1.000     | 1.000     | 1.000    | 0.732     | 0.221     | 0.268     | 0.707     |
| Koreans         | 0.815 | 0.824     | 0.824     | 0.815     | 1.000     | 1.000     | 1.000    | 0.868     | 0.231     | 0.139     | 0.870     |
| Japanese        | 0.784 | 0.706     | 0.735     | 0.786     | 1.000     | 0.990     | 1.000    | 0.850     | 0.392     | 0.147     | 0.847     |
| Ami             | 0.738 | 0.923     | 1.000     | 0.738     | 1.000     | 1.000     | 1.000    | 0.812     | 0.100     | 0.256     | 0.762     |
| Atayal          | 0.810 | 0.622     | 0.690     | 0.805     | 1.000     | 1.000     | 1.000    | 0.857     | 0.429     | 0.119     | 0.866     |
| Cheyenne        | 0.786 | 0.936     | 0.929     | 0.769     | 1.000     | 1.000     | 1.000    | 0.817     | 0.098     | 0.223     | 0.773     |
| Pima_AZ         | 0.873 | 0.784     | 0.780     | 0.870     | 1.000     | 1.000     | 1.000    | 0.873     | 0.220     | 0.127     | 0.873     |
| Pima_MX         | 0.943 | 0.528     | 0.528     | 0.943     | 1.000     | 1.000     | 1.000    | 0.923     | 0.462     | 0.057     | 0.943     |
| Maya            | 0.913 | 0.700     | 0.735     | 0.939     | 0.990     | 0.990     | 1.000    | 0.942     | 0.275     | 0.100     | 0.900     |
| Quechua         | 0.957 | 0.804     | 0.804     | 0.957     | 1.000     | 1.000     | 1.000    | 0.957     | 0.196     | 0.043     | 0.957     |
| Ticuna          | 0.854 | 0.698     | 0.692     | 0.854     | 1.000     | 1.000     | 1.000    | 0.856     | 0.315     | 0.162     | 0.854     |
| R.Surui         | 0.978 | 0.696     | 0.711     | 0.978     | 1.000     | 1.000     | 1.000    | 0.978     | 0.318     | 0.022     | 0.978     |
| Karitiana       | 0.954 | 0.528     | 0.591     | 0.955     | 1.000     | 1.000     | 1.000    | 0.956     | 0.455     | 0.045     | 0.955     |

**Supplemental Table S2.**

**Pairwise LD values for the 11 markers measured as  $r^2$  averaged across population samples**

|    |           | 1    | 2    | 3    | 4    | 5    | 6    | 7    | 8    | 9    | 10   | 11 |
|----|-----------|------|------|------|------|------|------|------|------|------|------|----|
| 1  | VNTR      |      | 48   | 25   | 48   | 48   | 45   | 21   | 47   | 47   | 48   | 48 |
| 2  | rs3813867 | 0.25 |      | 25   | 48   | 49   | 45   | 21   | 47   | 48   | 49   | 49 |
| 3  | rs2031920 | 0.14 | 0.02 |      | 25   | 25   | 24   | 11   | 25   | 25   | 25   | 25 |
| 4  | rs2070672 | 0.81 | 0.39 | 0.13 |      | 48   | 45   | 21   | 47   | 47   | 48   | 48 |
| 5  | rs6413420 | 0.31 | 0.60 | 0.05 | 0.41 |      | 45   | 21   | 47   | 48   | 49   | 49 |
| 6  | rs6413419 | 0.40 | 0.04 | 0.02 | 0.35 | 0.17 |      | 21   | 44   | 44   | 45   | 45 |
| 7  | rs915909  | 0.16 | 0.10 | 0.09 | 0.11 | 0.08 | 0.00 |      | 21   | 20   | 21   | 21 |
| 8  | rs4646976 | 0.75 | 0.27 | 0.09 | 0.61 | 0.32 | 0.32 | 0.18 |      | 46   | 47   | 47 |
| 9  | rs6413432 | 0.12 | 0.31 | 0.04 | 0.10 | 0.57 | 0.22 | 0.01 | 0.16 |      | 48   | 48 |
| 10 | rs2070676 | 0.20 | 0.50 | 0.04 | 0.34 | 0.62 | 0.21 | 0.11 | 0.21 | 0.42 |      | 49 |
| 11 | rs2515641 | 0.04 | 0.53 | 0.07 | 0.15 | 0.43 | 0.04 | 0.06 | 0.04 | 0.30 | 0.69 |    |

**Note:**

The lower triangle contains LD values and the upper triangle contains the number of populations contributing. All populations were typed for all the SNPs and the VNTR, but when a population sample is fixed for an allele (i.e. no variation for one or both of the paired polymorphisms), no LD value can be calculated.

**Supplemental Table S3. The 16 commonly occurring haplotypes explained as combinations of haplotypes at three core regions defined by markers 1-5, markers 6-9, and markers 10-11.**

| <b>Haplotypes</b>                | <b>Core A<br/>markers 1-5</b> | <b>Core B<br/>markers 6-9</b> | <b>Core C<br/>markers 10-11</b> |
|----------------------------------|-------------------------------|-------------------------------|---------------------------------|
| <b>Ancestral<br/>?GCAGGCAAGC</b> | <b>1</b>                      | <b>1</b>                      | <b>1</b>                        |
| <b>a: 6GCAGGCATCC</b>            | <b>1</b>                      | <b>2</b>                      | <b>3</b>                        |
| <b>b: 6GCAGGCATGT</b>            | <b>1</b>                      | <b>2</b>                      | <b>2</b>                        |
| <b>c: 6CTAGGCAACC</b>            | <b>5</b>                      | <b>1</b>                      | <b>3</b>                        |
| <b>d: 8GCGGGCGTGT</b>            | <b>2</b>                      | <b>3</b>                      | <b>2</b>                        |
| <b>e: 8GCGGGCAACC</b>            | <b>2</b>                      | <b>1</b>                      | <b>3</b>                        |
| <b>f: 6GCATGCATGT</b>            | <b>3</b>                      | <b>2</b>                      | <b>2</b>                        |
| <b>g: 6GCAGACATGT</b>            | <b>1</b>                      | <b>4</b>                      | <b>2</b>                        |
| <b>h: 6GCAGGCAACC</b>            | <b>1</b>                      | <b>1</b>                      | <b>3</b>                        |
| <b>i: 6GCAGGTATGT</b>            | <b>1</b>                      | <b>5</b>                      | <b>2</b>                        |
| <b>j: 8GCGGGCATGT</b>            | <b>2</b>                      | <b>2</b>                      | <b>2</b>                        |
| <b>k: 6GCAGACATCC</b>            | <b>1</b>                      | <b>4</b>                      | <b>3</b>                        |
| <b>l: 8GCGGGCATCC</b>            | <b>2</b>                      | <b>2</b>                      | <b>3</b>                        |
| <b>m: 6CCAGGCAACC</b>            | <b>4</b>                      | <b>1</b>                      | <b>3</b>                        |
| <b>n: 6CCAGACATCC</b>            | <b>4</b>                      | <b>4</b>                      | <b>3</b>                        |
| <b>o: 6GCATGCATCC</b>            | <b>3</b>                      | <b>2</b>                      | <b>3</b>                        |
| <b>p: 6CCAGGCGTGT</b>            | <b>4</b>                      | <b>3</b>                      | <b>2</b>                        |

Supplemental Figure S1. Fst and average heterozygosity values plotted by physical position for each of 11 polymorphisms studied at CYP2E1 based on 50 population samples

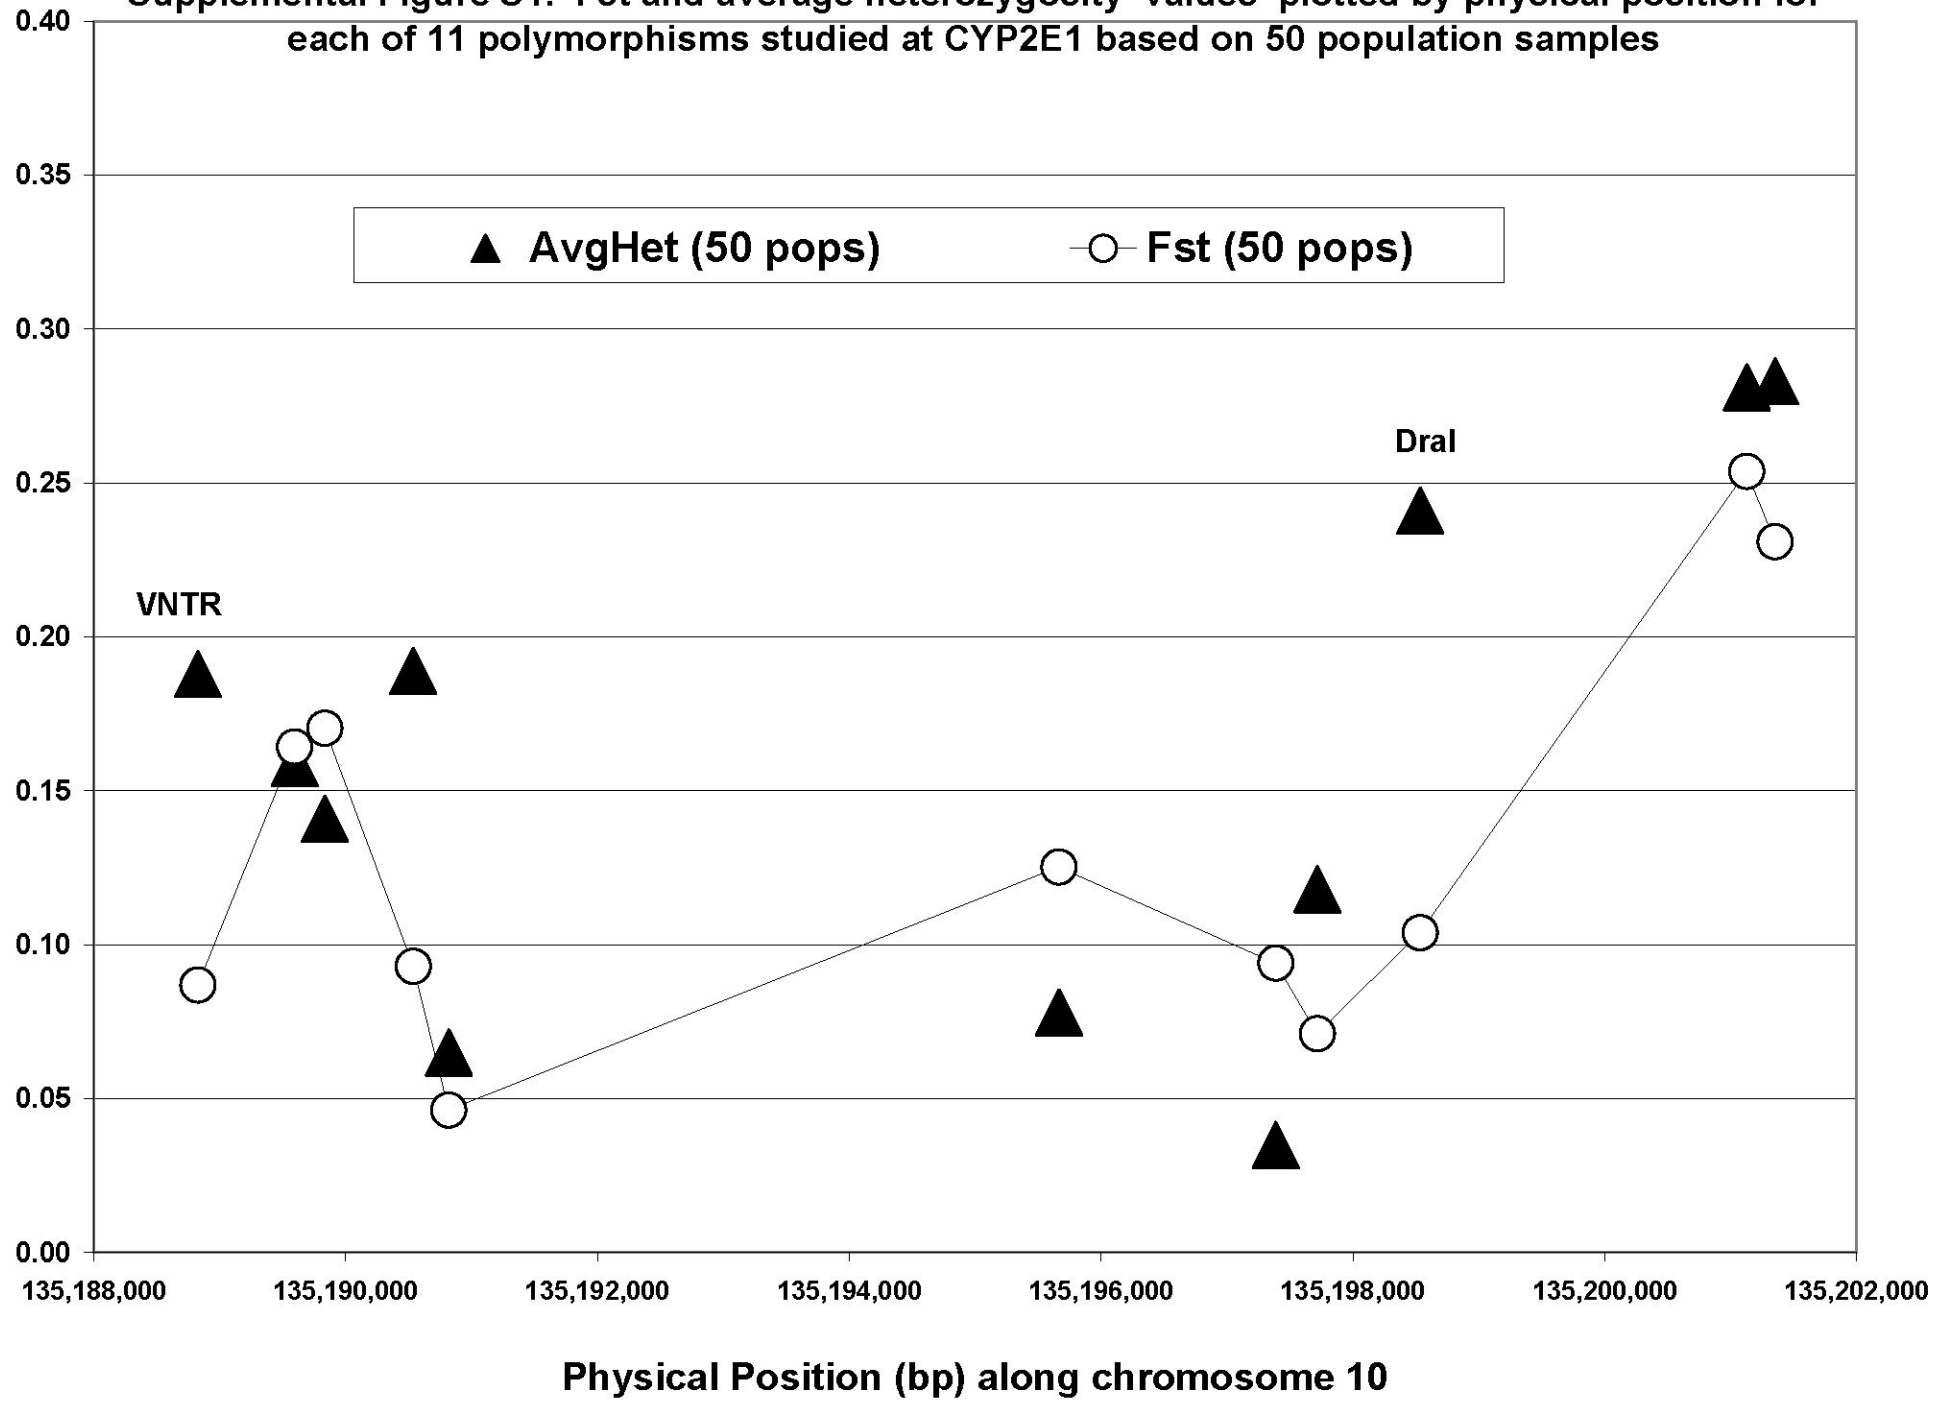



**Suppl.Fig S2b. Regions of high LD based on D' values at *CYP2E1* (Figure generated by HAPLOT)**

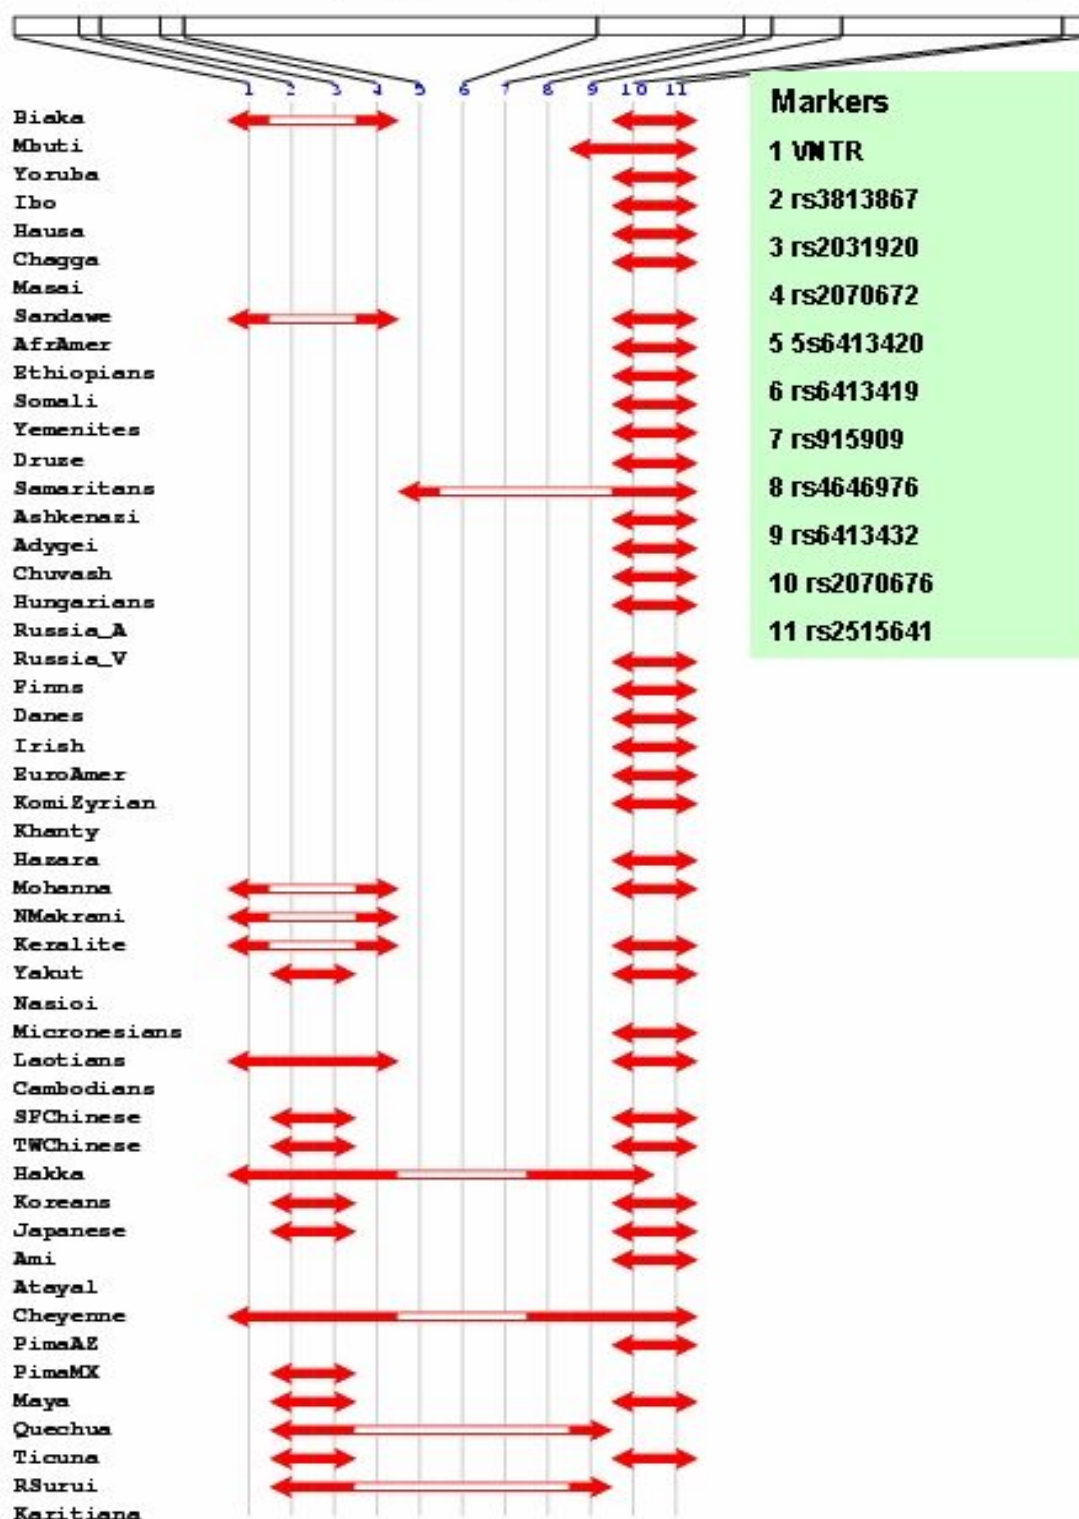



### Supplemental Figure S3: Haplotype frequencies for Core-A upstream markers (1-5) in 50 population samples.

The 5 common haplotypes with frequencies of 5% or more are shown. Rare haplotypes are combined in residual class.

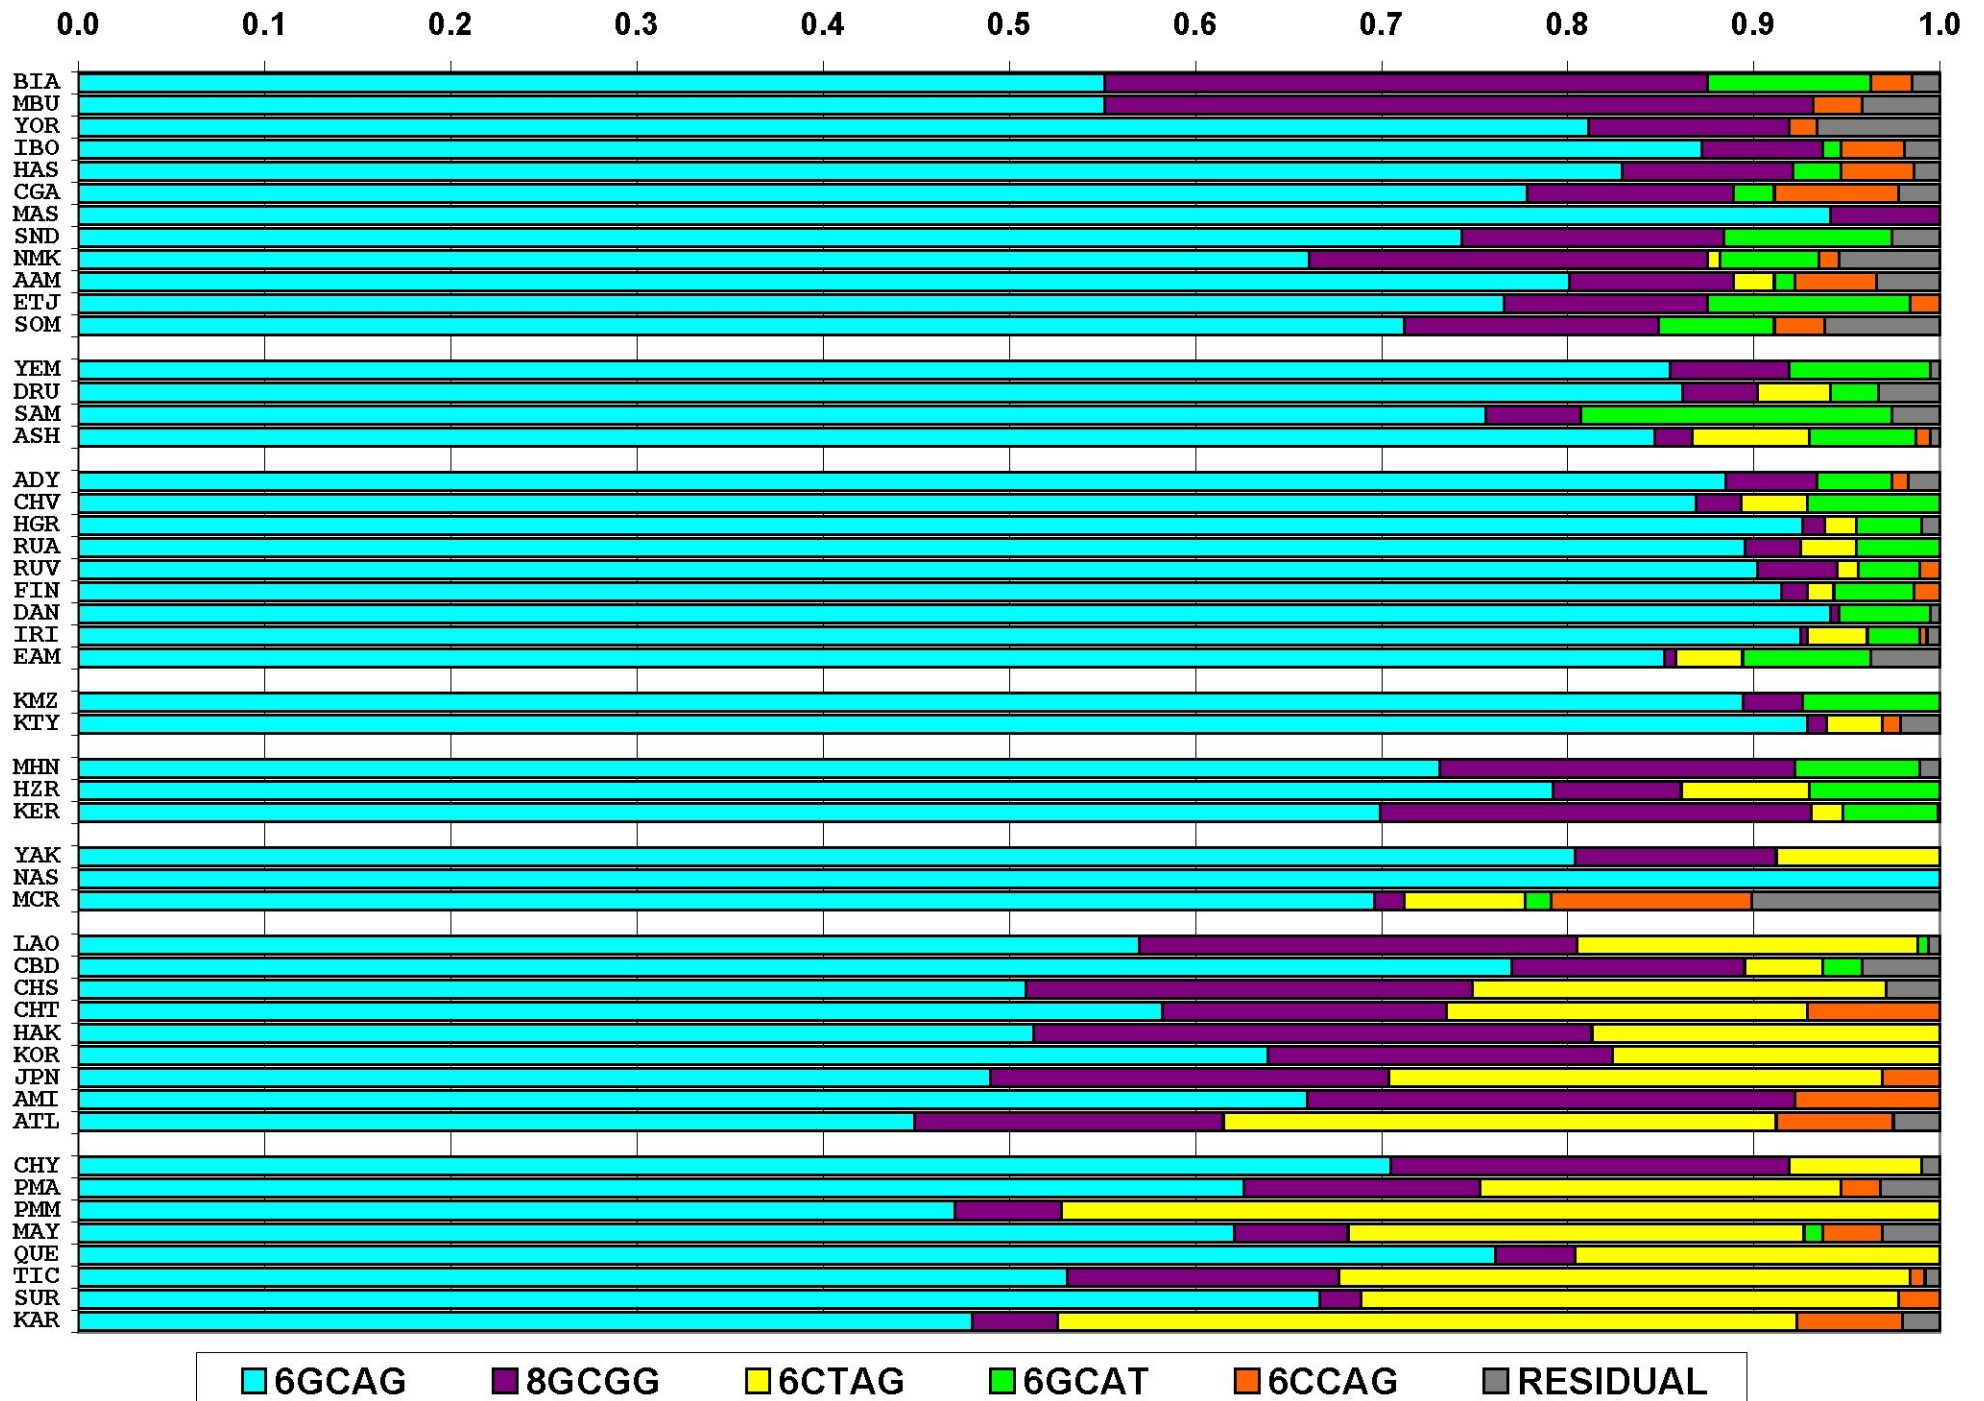

### Supplemental Figure S4: haplotype frequencies for Core B (markers 6 through 9).

The 4 common haplotypes with frequencies of 5% or more are shown. Rare haplotypes are combined in residual.

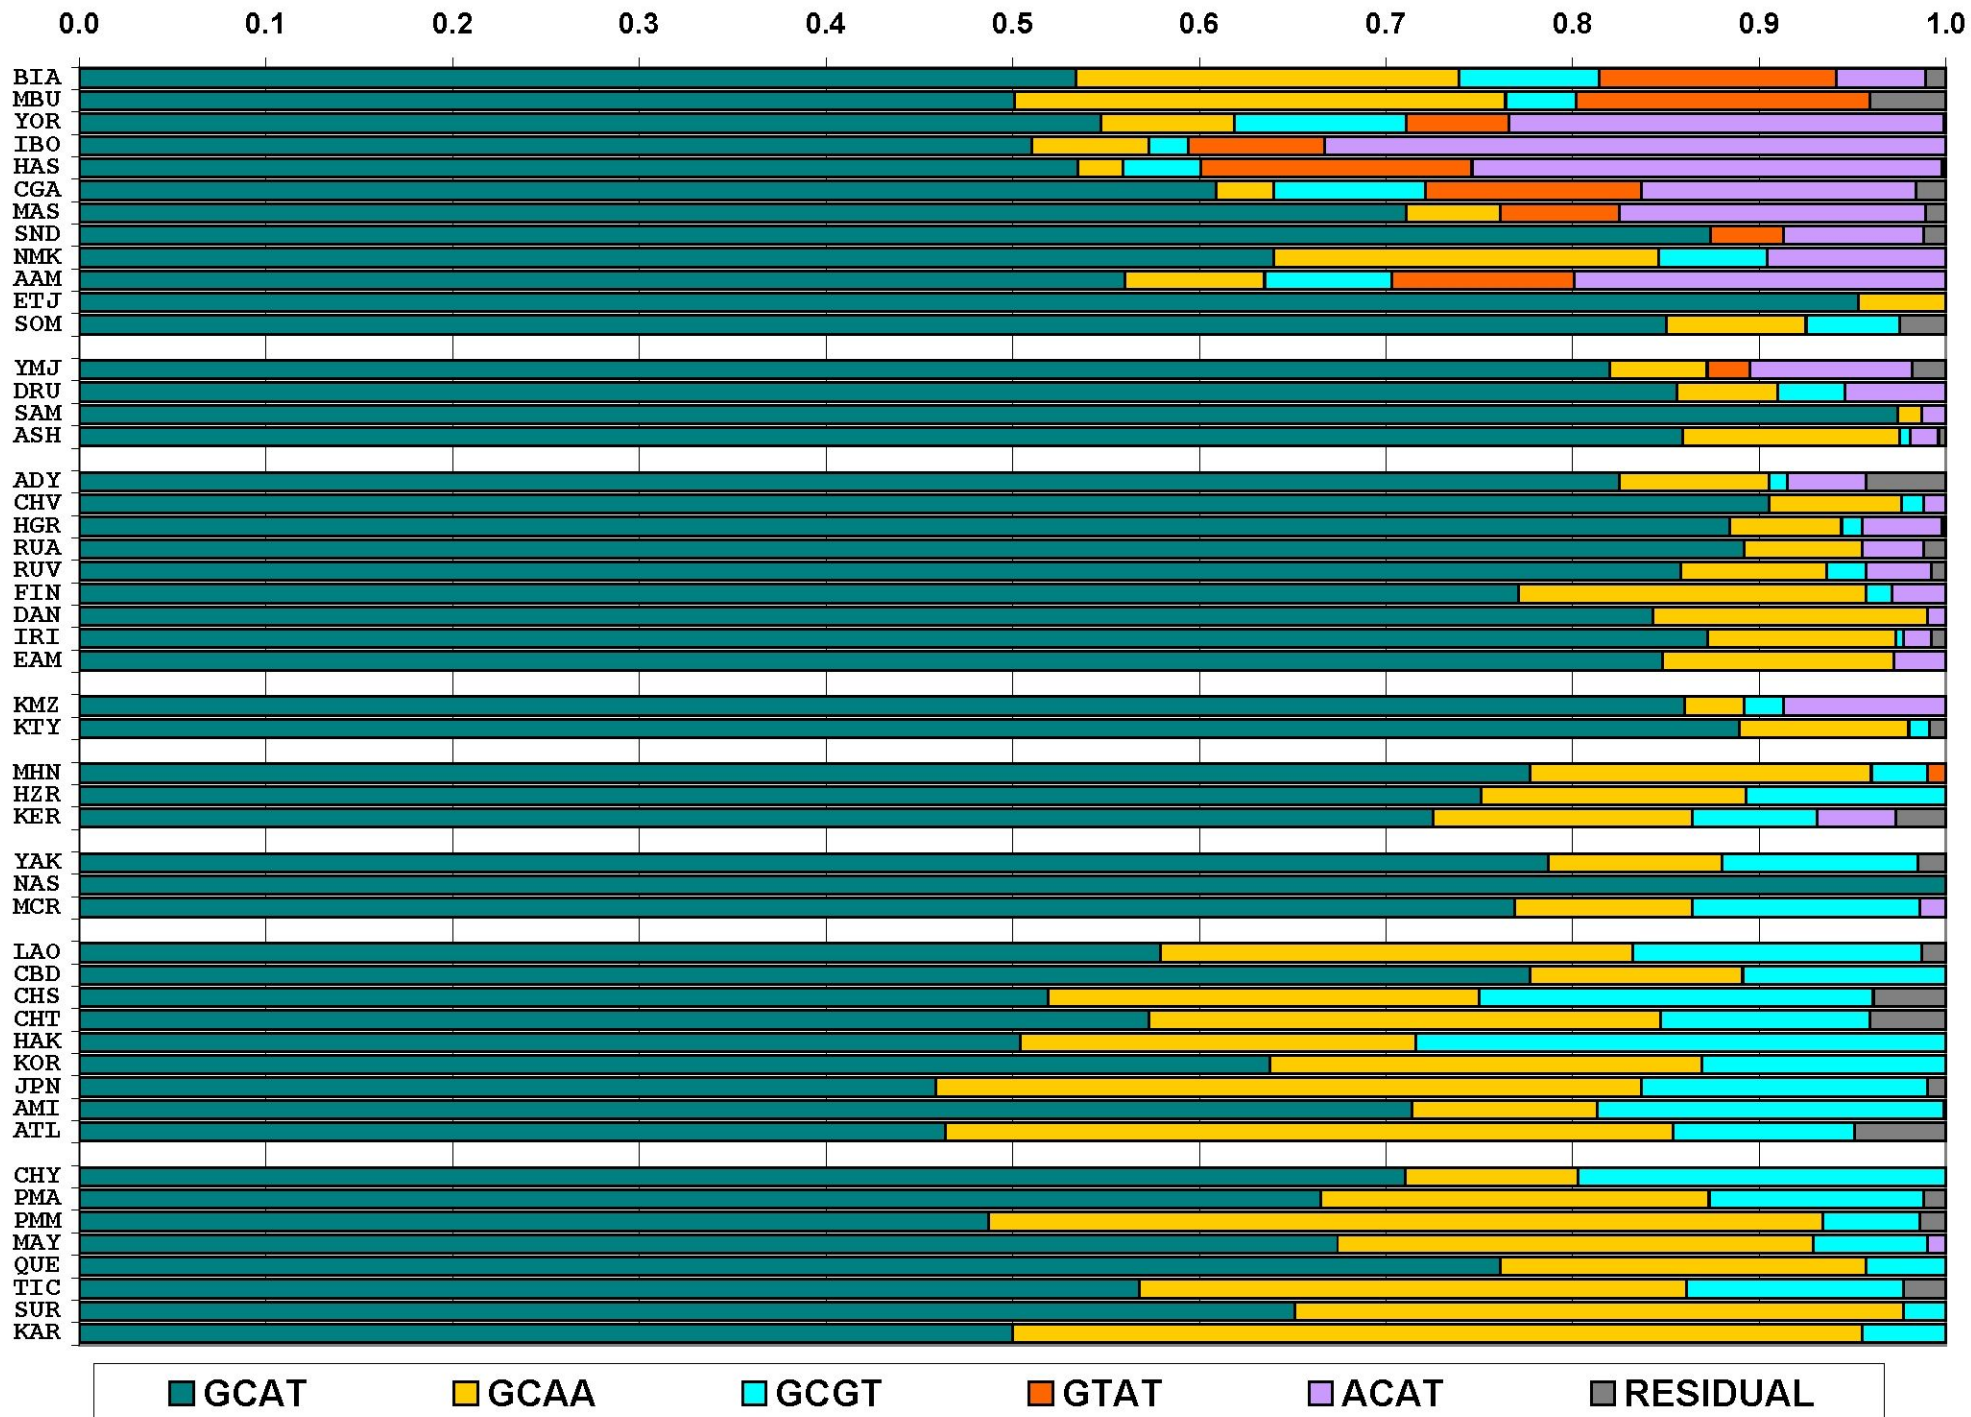

# Supplemental Figure S5: Haplotype frequencies for Core-C (markers 10-11)

Three of 4 haplotypes occur at common frequencies of 5% or more.

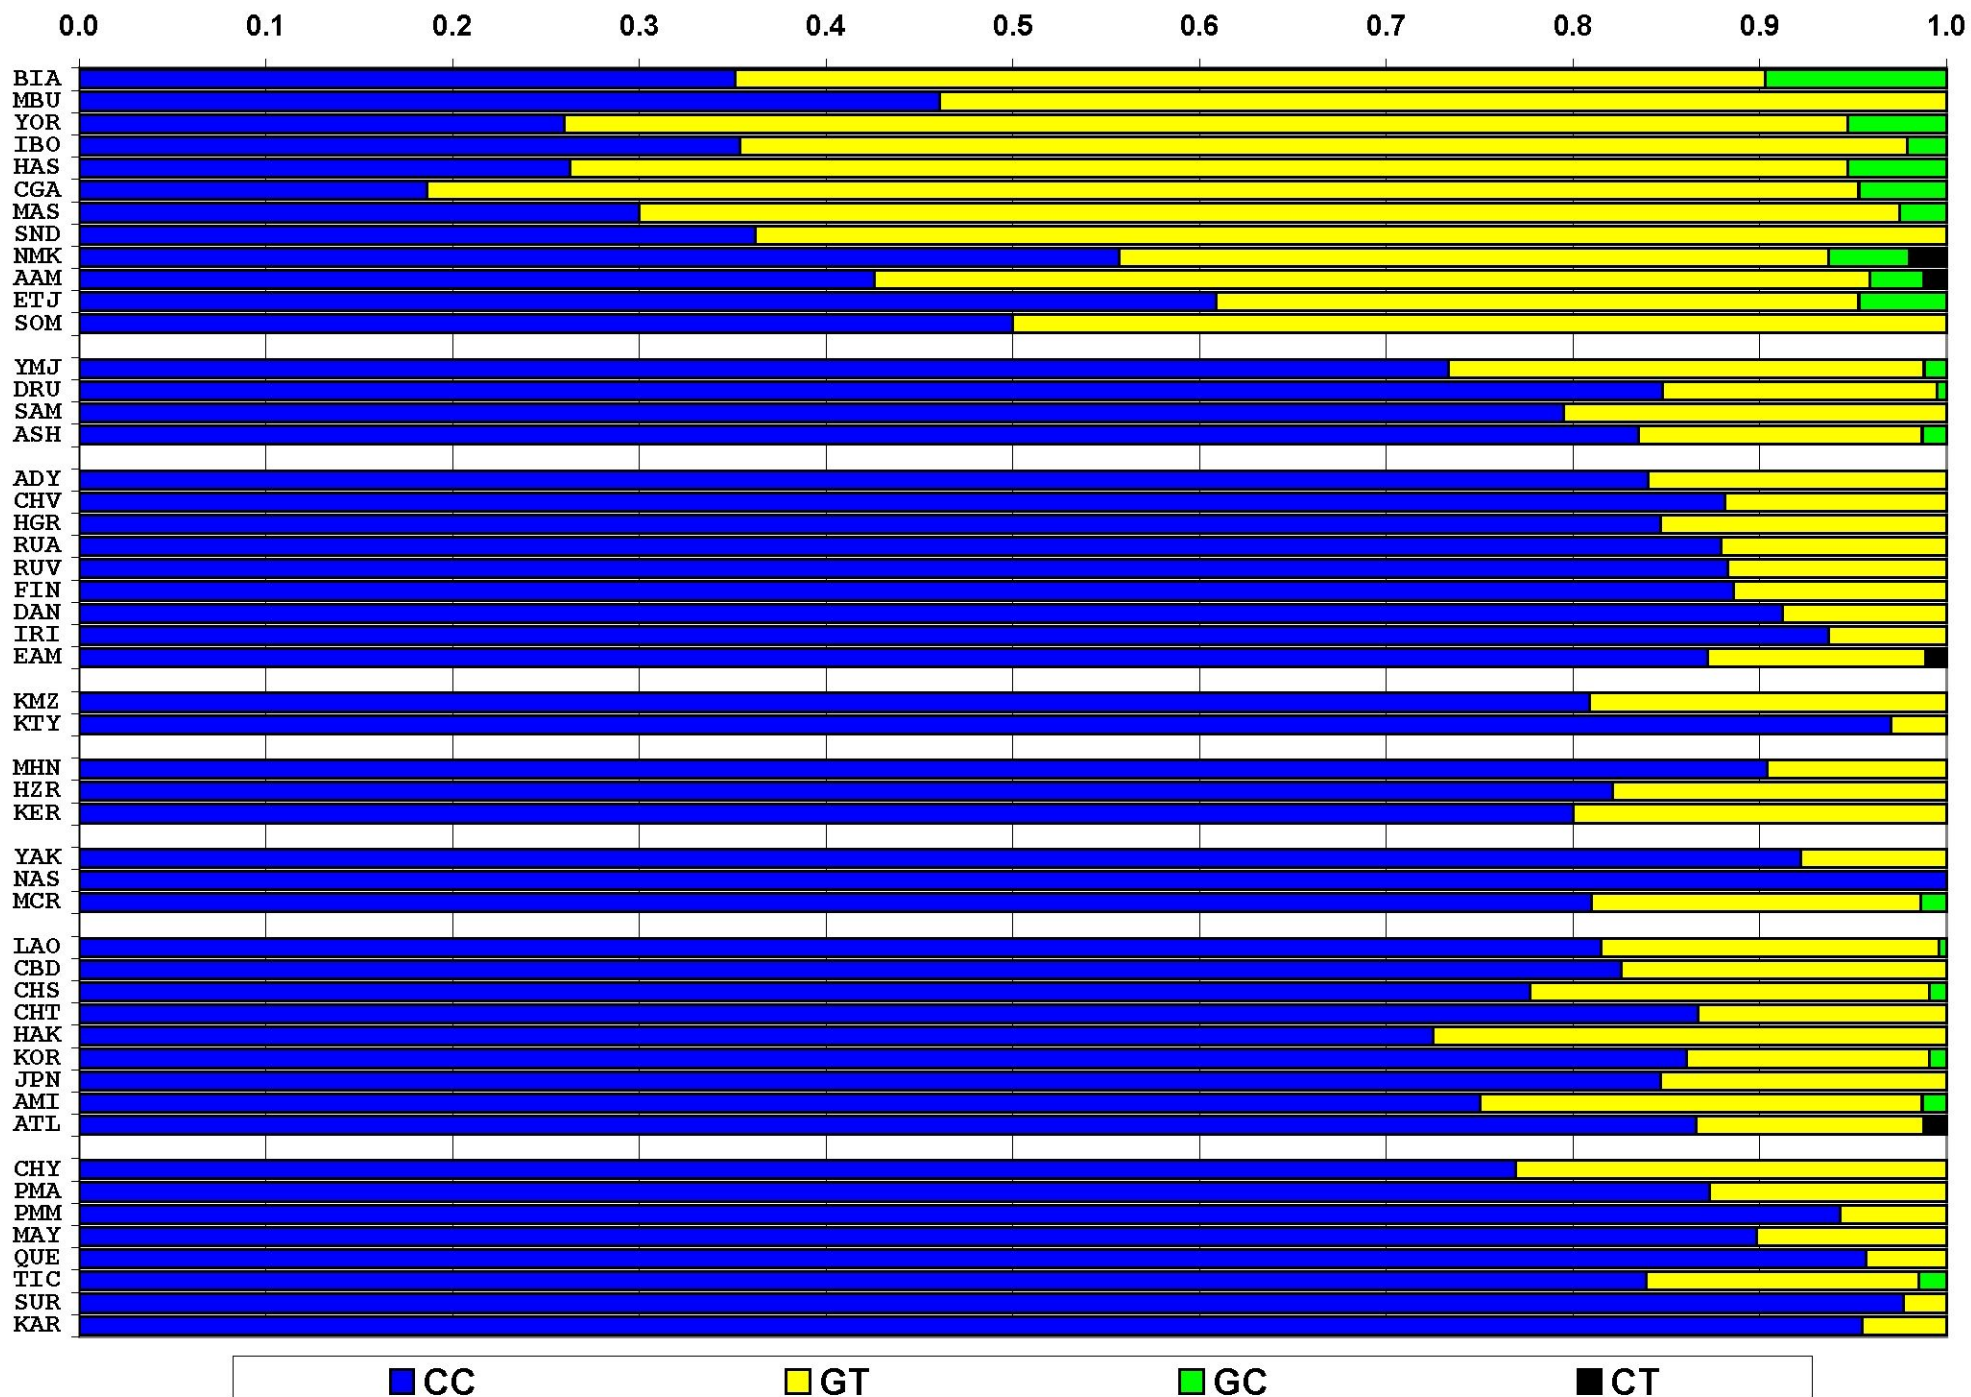

Supplement: NIHMS100361-supplement-supplement_1.pdf [file NIHMS100361-supplement-supplement_1.pdf]
